# Supplementary material
Source: Springer Nature journal article supplement (https://www.springermedizin.de/resource/supplementary/13034_2012_217_MOESM2_ESM.pdf/9652562)

a. Internalizing

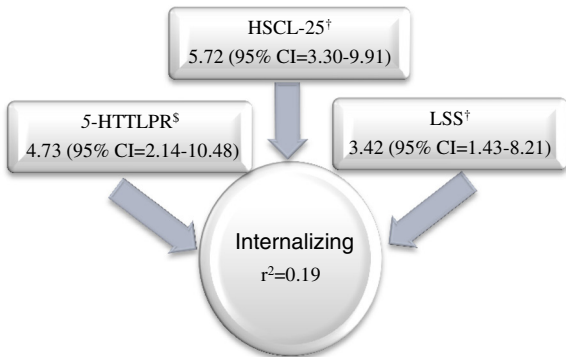

b. Anxious depressed

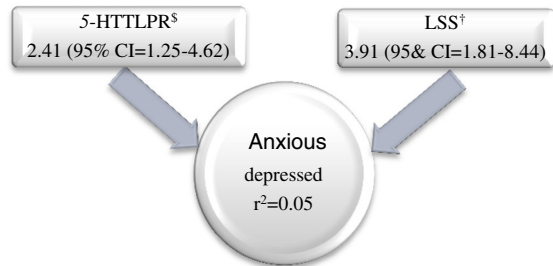

c. Withdrawn depressed

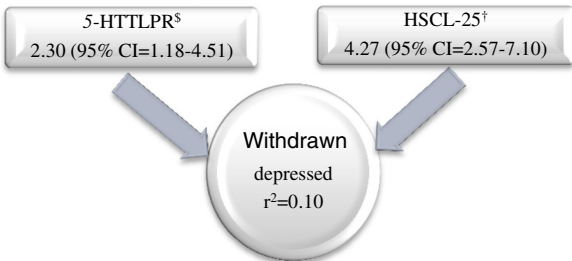

d. Externalizing

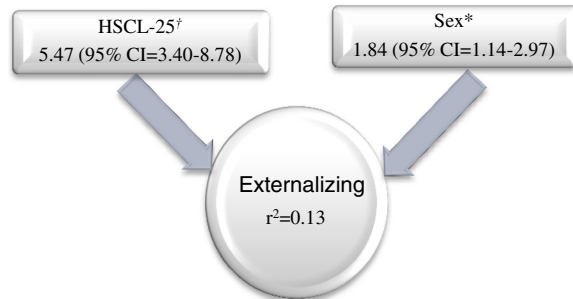

Supplement: MOESM2 [file 9652562]
